# Supplementary material
Source: Springer Nature journal article supplement (https://www.springermedizin.de/resource/supplementary/12889_2012_3987_MOESM3_ESM.pdf/9491124)

**Figure 3-** Reasons for acceptance of PITC among pregnant women attending ANC in Health facilities of Gondar town -----20

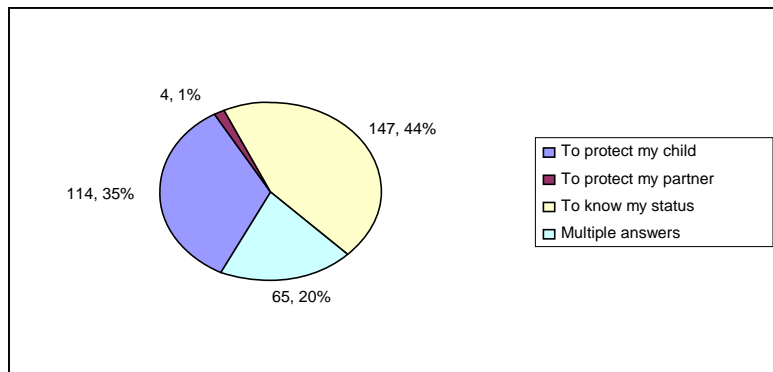

Supplement: MOESM3 [file 9491124]
